# Supplementary material for: Hidden Diversity in Honey Bee Gut Symbionts Detected by Single-Cell Genomics
Source: PubMed Central journal article supplement (PMC4161309; doi:10.1371/journal.pgen.1004596), 2014-09-11
Supplement: pgen.1004596.s009.pdf [file pgen.1004596.s009.pdf]

**Table S1.** Genotypes of 126 SAGs based on 16S rRNA gene amplicon sequencing and results of BLASTN analysis.

| Sample | 16S rRNA [bp] <sup>a</sup> | nr best BLASTN hit |           | Reference species BLASTN hit <sup>b</sup> |                                   |              |
|--------|----------------------------|--------------------|-----------|-------------------------------------------|-----------------------------------|--------------|
|        |                            | Identity [%]       | Accession | Species in nr database                    | Species name                      | Identity [%] |
| A03    | 1353                       | 99.85              | JQ746651  | <i>Snodgrassella alvi</i>                 | <i>Snodgrassella alvi</i> wkB2    | 99.56        |
| A06    | 1357                       | 99.71              | JQ746651  | <i>Snodgrassella alvi</i>                 | <i>Snodgrassella alvi</i> wkB2    | 99.41        |
| A07    | 1352                       | 99.85              | JQ746651  | <i>Snodgrassella alvi</i>                 | <i>Snodgrassella alvi</i> wkB2    | 99.56        |
| A08    | 1336                       | 99.70              | EF187247  | <i>Gilliamella apicola</i>                | <i>Gilliamella apicola</i> wkB1   | 99.18        |
| A09    | 1221                       | 99.59              | HM113176  | <i>Gilliamella apicola</i>                | <i>Gilliamella apicola</i> wkB1   | 98.94        |
| A13    | 1357                       | 100.00             | JQ673239  | <i>Snodgrassella alvi</i>                 | <i>Snodgrassella alvi</i> wkB2    | 99.48        |
| A15    | 1346                       | 99.70              | JX878306  | <i>Frischella perrara</i>                 | <i>Frischella perrara</i> PEB0191 | 99.70        |
| A16    | 1366                       | 99.85              | JQ746651  | <i>Snodgrassella alvi</i>                 | <i>Snodgrassella alvi</i> wkB2    | 99.56        |
| A18    | 1313                       | 99.62              | HM113221  | <i>Snodgrassella alvi</i>                 | <i>Snodgrassella alvi</i> wkB2    | 99.62        |
| A22    | 624                        | 98.08              | HE613291  | <i>Acetobacteriaceae</i> sp.              | n.d.                              | n.d.         |
| A23    | 1349                       | 99.93              | JQ746650  | <i>Snodgrassella alvi</i>                 | <i>Snodgrassella alvi</i> wkB2    | 99.93        |
| B02    | 1538                       | 99.22              | JQ936674  | <i>Gilliamella apicola</i>                | <i>Gilliamella apicola</i> wkB1   | 99.22        |
| B03    | 1326                       | 99.77              | EF187247  | <i>Gilliamella apicola</i>                | <i>Gilliamella apicola</i> wkB1   | 99.25        |
| B05    | 1354                       | 99.85              | JQ746651  | <i>Snodgrassella alvi</i>                 | <i>Snodgrassella alvi</i> wkB2    | 99.56        |
| B06    | 1310                       | 99.47              | JQ936674  | <i>Gilliamella apicola</i>                | <i>Gilliamella apicola</i> wkB1   | 99.47        |
| B09    | 1391                       | 99.64              | JQ746651  | <i>Snodgrassella alvi</i>                 | <i>Snodgrassella alvi</i> wkB2    | 99.35        |
| B11    | 1361                       | 99.93              | JQ673239  | <i>Snodgrassella alvi</i>                 | <i>Snodgrassella alvi</i> wkB2    | 99.41        |
| B15    | 1360                       | 99.27              | JQ746650  | <i>Snodgrassella alvi</i>                 | <i>Snodgrassella alvi</i> wkB2    | 99.27        |
| B18    | 1355                       | 100.00             | JQ746651  | <i>Snodgrassella alvi</i>                 | <i>Snodgrassella alvi</i> wkB2    | 99.71        |
| B23    | 1356                       | 99.78              | JQ746650  | <i>Snodgrassella alvi</i>                 | <i>Snodgrassella alvi</i> wkB2    | 99.78        |
| C02    | 1320                       | 99.55              | EF187247  | <i>Gilliamella apicola</i>                | <i>Gilliamella apicola</i> wkB1   | 99.02        |
| C04    | 1534                       | 99.80              | JX878306  | <i>Frischella perrara</i>                 | <i>Frischella perrara</i> PEB0191 | 99.80        |
| C06    | 1323                       | 100.00             | JQ746650  | <i>Snodgrassella alvi</i>                 | <i>Snodgrassella alvi</i> wkB2    | 100.00       |
| C08    | 1349                       | 100.00             | JQ746651  | <i>Snodgrassella alvi</i>                 | <i>Snodgrassella alvi</i> wkB2    | 99.70        |
| C10    | 624                        | 100.00             | JQ582002  | <i>Gilliamella apicola</i>                | <i>Gilliamella apicola</i> wkB1   | 99.68        |
| C11    | 1276                       | 99.76              | EF187247  | <i>Gilliamella apicola</i>                | <i>Gilliamella apicola</i> wkB1   | 99.29        |
| C14    | 1368                       | 100.00             | JQ673239  | <i>Snodgrassella alvi</i>                 | <i>Snodgrassella alvi</i> wkB2    | 99.49        |
| C17    | 1291                       | 99.92              | JQ673239  | <i>Snodgrassella alvi</i>                 | <i>Snodgrassella alvi</i> wkB2    | 99.46        |
| C23    | 1332                       | 99.92              | HM111936  | <i>Gilliamella apicola</i>                | <i>Gilliamella apicola</i> wkB1   | 99.47        |
| D05    | 1358                       | 99.78              | JQ673244  | <i>Gilliamella apicola</i>                | <i>Gilliamella apicola</i> wkB1   | 99.41        |
| D10    | 1367                       | 99.56              | EF187247  | <i>Gilliamella apicola</i>                | <i>Gilliamella apicola</i> wkB1   | 99.12        |
| D14    | 1370                       | 99.56              | JQ673244  | <i>Gilliamella apicola</i>                | <i>Gilliamella apicola</i> wkB1   | 98.91        |
| D16    | 1162                       | 99.83              | JQ673234  | <i>Gilliamella apicola</i>                | <i>Gilliamella apicola</i> wkB1   | 99.40        |
| D18    | 1357                       | 100.00             | JQ673239  | <i>Snodgrassella alvi</i>                 | <i>Snodgrassella alvi</i> wkB2    | 99.48        |
| D23    | 1377                       | 99.49              | EF187247  | <i>Gilliamella apicola</i>                | <i>Gilliamella apicola</i> wkB1   | 98.98        |
| E04    | 1343                       | 99.70              | EF187248  | <i>Gilliamella apicola</i>                | <i>Gilliamella apicola</i> wkB1   | 99.48        |
| E06    | 1357                       | 100.00             | JQ673239  | <i>Snodgrassella alvi</i>                 | <i>Snodgrassella alvi</i> wkB2    | 99.48        |
| E08    | 589                        | 97.79              | JQ581781  | <i>Gilliamella apicola</i>                | <i>Gilliamella apicola</i> wkB1   | 96.94        |
| E13    | 1321                       | 99.77              | EF187248  | <i>Gilliamella apicola</i>                | <i>Gilliamella apicola</i> wkB1   | 99.39        |
| E15    | 624                        | 99.52              | JQ746651  | <i>Snodgrassella alvi</i>                 | <i>Snodgrassella alvi</i> wkB2    | 98.88        |
| E16    | 1318                       | 99.92              | JQ746651  | <i>Snodgrassella alvi</i>                 | <i>Snodgrassella alvi</i> wkB2    | 99.62        |
| E17    | 1280                       | 99.69              | EF187247  | <i>Gilliamella apicola</i>                | <i>Gilliamella apicola</i> wkB1   | 99.14        |
| E21    | 1316                       | 99.77              | EF187247  | <i>Gilliamella apicola</i>                | <i>Gilliamella apicola</i> wkB1   | 99.24        |
| F02    | 636                        | 98.41              | HE613310  | <i>Lactobacillus</i> sp.                  | n.d.                              | n.d.         |
| F02    | 1354                       | 100.00             | JQ673239  | <i>Snodgrassella alvi</i>                 | <i>Snodgrassella alvi</i> wkB2    | 99.48        |
| F06    | 1351                       | 99.93              | JQ673239  | <i>Snodgrassella alvi</i>                 | <i>Snodgrassella alvi</i> wkB2    | 99.41        |
| F08    | 1377                       | 99.64              | EF187247  | <i>Gilliamella apicola</i>                | <i>Gilliamella apicola</i> wkB1   | 99.13        |
| F09    | 624                        | 98.88              | JQ746651  | <i>Snodgrassella alvi</i>                 | <i>Snodgrassella alvi</i> wkB2    | 98.24        |
| F11    | 1369                       | 99.78              | EF187247  | <i>Gilliamella apicola</i>                | <i>Gilliamella apicola</i> wkB1   | 99.27        |
| F14    | 1325                       | 100.00             | JQ746650  | <i>Snodgrassella alvi</i>                 | <i>Snodgrassella alvi</i> wkB2    | 100.00       |
| F16    | 1361                       | 99.93              | JQ746650  | <i>Snodgrassella alvi</i>                 | <i>Snodgrassella alvi</i> wkB2    | 99.93        |
| F20    | 1366                       | 99.71              | JQ746651  | <i>Snodgrassella alvi</i>                 | <i>Snodgrassella alvi</i> wkB2    | 99.41        |
| G03    | 1333                       | 100.00             | JQ673239  | <i>Snodgrassella alvi</i>                 | <i>Snodgrassella alvi</i> wkB2    | 99.48        |
| G06    | 624                        | 99.68              | JQ581781  | <i>Gilliamella apicola</i>                | <i>Gilliamella apicola</i> wkB1   | 98.72        |
| G07    | 620                        | 99.35              | JQ581772  | <i>Gilliamella apicola</i>                | <i>Gilliamella apicola</i> wkB1   | 98.71        |
| G10    | 1320                       | 99.70              | EF187247  | <i>Gilliamella apicola</i>                | <i>Gilliamella apicola</i> wkB1   | 99.17        |
| G11    | 1359                       | 99.71              | EF187248  | <i>Gilliamella apicola</i>                | <i>Gilliamella apicola</i> wkB1   | 99.48        |
| G14    | 1346                       | 100.00             | JQ673239  | <i>Snodgrassella alvi</i>                 | <i>Snodgrassella alvi</i> wkB2    | 99.48        |
| G15    | 1322                       | 99.62              | HM113221  | <i>Snodgrassella alvi</i>                 | <i>Snodgrassella alvi</i> wkB2    | 99.62        |
| G16    | 620                        | 99.19              | JQ581835  | <i>Snodgrassella alvi</i>                 | <i>Snodgrassella alvi</i> wkB2    | 97.75        |
| G20    | 1277                       | 99.69              | JQ673249  | <i>Gilliamella apicola</i>                | <i>Gilliamella apicola</i> wkB1   | 99.06        |
| G21    | 1361                       | 99.93              | JQ746650  | <i>Snodgrassella alvi</i>                 | <i>Snodgrassella alvi</i> wkB2    | 99.93        |

| Sample | nr best BLASTN hit         |              |           |                            | Reference species BLASTN hit <sup>b</sup> |              |
|--------|----------------------------|--------------|-----------|----------------------------|-------------------------------------------|--------------|
|        | 16S rRNA [bp] <sup>a</sup> | Identity [%] | Accession | Species in nr database     | Species name                              | Identity [%] |
| I03    | 1305                       | 99.69        | EF187247  | <i>Gilliamella apicola</i> | <i>Gilliamella apicola</i> wkB1           | 99.16        |
| I04    | 1320                       | 98.18        | EF187250  | <i>Frischella perrara</i>  | <i>Frischella perrara</i> PEB0191         | 98.11        |
| I07    | 1344                       | 99.70        | JQ673249  | <i>Gilliamella apicola</i> | <i>Gilliamella apicola</i> wkB1           | 99.03        |
| I09    | 1377                       | 99.64        | EF187247  | <i>Gilliamella apicola</i> | <i>Gilliamella apicola</i> wkB1           | 99.20        |
| I10    | 1328                       | 99.55        | JQ936674  | <i>Gilliamella apicola</i> | <i>Gilliamella apicola</i> wkB1           | 99.55        |
| I11    | 1365                       | 99.56        | JQ936674  | <i>Gilliamella apicola</i> | <i>Gilliamella apicola</i> wkB1           | 99.56        |
| I17    | 1357                       | 99.78        | JX878306  | <i>Frischella perrara</i>  | <i>Frischella perrara</i> PEB0191         | 99.78        |
| I19    | 1372                       | 99.42        | JQ936674  | <i>Gilliamella apicola</i> | <i>Gilliamella apicola</i> wkB1           | 99.42        |
| I20    | 1538                       | 99.09        | JQ936674  | <i>Gilliamella apicola</i> | <i>Gilliamella apicola</i> wkB1           | 99.09        |
| I22    | 1534                       | 99.93        | JX878306  | <i>Frischella perrara</i>  | <i>Frischella perrara</i> PEB0191         | 99.93        |
| J02    | 1319                       | 99.47        | AY370192  | <i>Gilliamella apicola</i> | <i>Gilliamella apicola</i> wkB1           | 99.32        |
| J03    | 1334                       | 99.70        | EF187248  | <i>Gilliamella apicola</i> | <i>Gilliamella apicola</i> wkB1           | 99.48        |
| J04    | 1371                       | 99.93        | JQ673239  | <i>Snodgrassella alvi</i>  | <i>Snodgrassella alvi</i> wkB2            | 99.42        |
| J06    | 1297                       | 99.92        | HM111936  | <i>Gilliamella apicola</i> | <i>Gilliamella apicola</i> wkB1           | 99.46        |
| J08    | 1379                       | 99.71        | EF187248  | <i>Gilliamella apicola</i> | <i>Gilliamella apicola</i> wkB1           | 99.27        |
| J10    | 619                        | 96.28        | JQ746651  | <i>Snodgrassella alvi</i>  | <i>Snodgrassella alvi</i> wkB2            | 95.65        |
| J17    | 619                        | 100.00       | JQ581810  | <i>Gilliamella apicola</i> | <i>Gilliamella apicola</i> wkB1           | 99.03        |
| J19    | 679                        | 100.00       | JQ581937  | <i>Snodgrassella alvi</i>  | <i>Snodgrassella alvi</i> wkB2            | 99.85        |
| J21    | 1548                       | 99.68        | JQ746650  | <i>Snodgrassella alvi</i>  | <i>Snodgrassella alvi</i> wkB2            | 99.68        |
| J22    | 610                        | 99.67        | JQ581780  | <i>Gilliamella apicola</i> | <i>Gilliamella apicola</i> wkB1           | 98.52        |
| J23    | 1369                       | 99.63        | JQ746650  | <i>Snodgrassella alvi</i>  | <i>Snodgrassella alvi</i> wkB2            | 99.63        |
| K02    | 1306                       | 99.69        | JQ746651  | <i>Snodgrassella alvi</i>  | <i>Snodgrassella alvi</i> wkB2            | 99.39        |
| K06    | 1332                       | 99.62        | HM113280  | <i>Gilliamella apicola</i> | <i>Gilliamella apicola</i> wkB1           | 99.33        |
| K10    | 610                        | 100.00       | JQ582002  | <i>Gilliamella apicola</i> | <i>Gilliamella apicola</i> wkB1           | 99.67        |
| K15    | 610                        | 99.18        | JQ581937  | <i>Snodgrassella alvi</i>  | <i>Snodgrassella alvi</i> wkB2            | 99.02        |
| K17    | 608                        | 96.55        | JQ581810  | <i>Gilliamella apicola</i> | <i>Gilliamella apicola</i> wkB1           | 95.57        |
| K18    | 1280                       | 99.77        | EF187248  | <i>Gilliamella apicola</i> | <i>Gilliamella apicola</i> wkB1           | 99.30        |
| K18    | 608                        | 99.84        | JQ581772  | <i>Gilliamella apicola</i> | <i>Gilliamella apicola</i> wkB1           | 99.18        |
| K19    | 1332                       | 99.47        | JQ673239  | <i>Snodgrassella alvi</i>  | <i>Snodgrassella alvi</i> wkB2            | 99.10        |
| K21    | 1361                       | 99.56        | JQ936674  | <i>Gilliamella apicola</i> | <i>Gilliamella apicola</i> wkB1           | 99.56        |
| K22    | 1321                       | 99.77        | JQ673249  | <i>Gilliamella apicola</i> | <i>Gilliamella apicola</i> wkB1           | 99.47        |
| L2     | 1359                       | 99.56        | JQ936674  | <i>Gilliamella apicola</i> | <i>Gilliamella apicola</i> wkB1           | 99.56        |
| L10    | 609                        | 99.84        | JQ581772  | <i>Gilliamella apicola</i> | <i>Gilliamella apicola</i> wkB1           | 99.18        |
| L11    | 1353                       | 99.70        | EF187247  | <i>Gilliamella apicola</i> | <i>Gilliamella apicola</i> wkB1           | 99.26        |
| L15    | 1276                       | 99.84        | EF187247  | <i>Gilliamella apicola</i> | <i>Gilliamella apicola</i> wkB1           | 99.29        |
| L16    | 1352                       | 99.70        | EF187247  | <i>Gilliamella apicola</i> | <i>Gilliamella apicola</i> wkB1           | 99.26        |
| L22    | 1305                       | 99.92        | JQ746651  | <i>Snodgrassella alvi</i>  | <i>Snodgrassella alvi</i> wkB2            | 99.62        |
| L23    | 1324                       | 99.62        | JQ746650  | <i>Gilliamella apicola</i> | <i>Snodgrassella alvi</i> wkB2            | 99.62        |
| M16    | 1361                       | 99.41        | EF187248  | <i>Gilliamella apicola</i> | <i>Gilliamella apicola</i> wkB1           | 99.04        |
| M18    | 1333                       | 100.00       | JQ673239  | <i>Snodgrassella alvi</i>  | <i>Snodgrassella alvi</i> wkB2            | 99.48        |
| M20    | 1319                       | 99.85        | EF187247  | <i>Gilliamella apicola</i> | <i>Gilliamella apicola</i> wkB1           | 99.32        |
| N04    | 1271                       | 99.76        | EF187247  | <i>Gilliamella apicola</i> | <i>Gilliamella apicola</i> wkB1           | 99.21        |
| N05    | 1347                       | 99.85        | JQ746651  | <i>Snodgrassella alvi</i>  | <i>Snodgrassella alvi</i> wkB2            | 99.55        |
| N06    | 636                        | 99.84        | JQ581967  | <i>Snodgrassella alvi</i>  | <i>Snodgrassella alvi</i> wkB2            | 99.68        |
| N10    | 639                        | 100.00       | JQ746651  | <i>Snodgrassella alvi</i>  | <i>Snodgrassella alvi</i> wkB2            | 99.38        |
| N11    | 1276                       | 99.84        | EF187247  | <i>Gilliamella apicola</i> | <i>Gilliamella apicola</i> wkB1           | 99.29        |
| N16    | 1374                       | 99.93        | JQ746650  | <i>Snodgrassella alvi</i>  | <i>Snodgrassella alvi</i> wkB2            | 99.93        |
| N18    | 1324                       | 99.85        | EF187247  | <i>Gilliamella apicola</i> | <i>Gilliamella apicola</i> wkB1           | 99.47        |
| N22    | 1352                       | 99.85        | JQ746651  | <i>Snodgrassella alvi</i>  | <i>Snodgrassella alvi</i> wkB2            | 99.56        |
| N23    | 1282                       | 99.61        | HM113221  | <i>Snodgrassella alvi</i>  | <i>Snodgrassella alvi</i> wkB2            | 99.61        |
| O02    | 1547                       | 99.55        | JQ746651  | <i>Snodgrassella alvi</i>  | <i>Snodgrassella alvi</i> wkB2            | 99.29        |
| O03    | 609                        | 99.67        | JQ581770  | <i>Gilliamella apicola</i> | <i>Gilliamella apicola</i> wkB1           | 98.52        |
| O05    | 609                        | 98.69        | JQ581835  | <i>Snodgrassella alvi</i>  | <i>Snodgrassella alvi</i> wkB2            | 97.55        |
| O06    | 1276                       | 99.92        | JQ673234  | <i>Gilliamella apicola</i> | <i>Gilliamella apicola</i> wkB1           | 99.14        |
| O09    | 1368                       | 99.71        | EF187247  | <i>Gilliamella apicola</i> | <i>Gilliamella apicola</i> wkB1           | 99.20        |
| O10    | 1279                       | 100.00       | JQ673252  | <i>Snodgrassella alvi</i>  | <i>Snodgrassella alvi</i> wkB2            | 99.45        |
| O11    | 1547                       | 99.81        | JQ746651  | <i>Snodgrassella alvi</i>  | <i>Snodgrassella alvi</i> wkB2            | 99.55        |
| O15    | 614                        | 99.84        | JQ581781  | <i>Gilliamella apicola</i> | <i>Gilliamella apicola</i> wkB1           | 98.86        |
| O19    | 1355                       | 99.70        | EF187247  | <i>Gilliamella apicola</i> | <i>Gilliamella apicola</i> wkB1           | 99.19        |
| O22    | 1349                       | 99.63        | JQ746650  | <i>Snodgrassella alvi</i>  | <i>Snodgrassella alvi</i> wkB2            | 99.63        |
| P04    | 1360                       | 99.56        | JQ936674  | <i>Gilliamella apicola</i> | <i>Gilliamella apicola</i> wkB1           | 99.56        |
| P14    | 1547                       | 99.74        | JQ746651  | <i>Snodgrassella alvi</i>  | <i>Snodgrassella alvi</i> wkB2            | 99.48        |
| P16    | 1353                       | 99.85        | JQ746651  | <i>Snodgrassella alvi</i>  | <i>Snodgrassella alvi</i> wkB2            | 99.56        |
| P17    | 1538                       | 98.96        | JQ936674  | <i>Gilliamella apicola</i> | <i>Gilliamella apicola</i> wkB1           | 98.96        |

<sup>a</sup>length of sequenced 16S rRNA fragment; <sup>b</sup>BLASTN hit against the typing strain for described species
