# Supplementary material for: Hidden Diversity in Honey Bee Gut Symbionts Detected by Single-Cell Genomics
Source: PubMed Central journal article supplement (PMC4161309; doi:10.1371/journal.pgen.1004596), 2014-09-11
Supplement: pgen.1004596.s010.pdf [file pgen.1004596.s010.pdf]

**Table S2.** Genes conflicting with overall patterns of divergence between O02, J21, and P14.

| <b>Gene in wkB2</b> | <b>Annotation</b>                                    | <b>Best BLASTX hit in nr</b>                          | <b>O02 - J21<sup>a</sup></b> |                      | <b>P14 - J21<sup>a</sup></b> |                      | <b>P14 - O02<sup>a</sup></b> |                       |
|---------------------|------------------------------------------------------|-------------------------------------------------------|------------------------------|----------------------|------------------------------|----------------------|------------------------------|-----------------------|
|                     |                                                      |                                                       | <b>abs <i>dS</i></b>         | <b>rel <i>dS</i></b> | <b>abs <i>dS</i></b>         | <b>rel <i>dS</i></b> | <b>abs <i>dS</i></b>         | <b>rel. <i>dS</i></b> |
| SALWKB2_0167        | ArsR family transcriptional regulator                | Paenibacillus sp. Y412MC10; ref WP_009593529.1        | 0.13                         | 0.43                 | 0.05                         | 0.16                 | 0.13                         | 0.42                  |
| SALWKB2_0168        | Multidrug resistance protein                         | Lactobacillus rhamnosus LOCK900; ref YP_008202154.1   | 0.34                         | 0.33                 | 0.44                         | 0.43                 | 0.24                         | 0.24                  |
| SALWKB2_0450        | Urease accessory protein E                           | Haemophilus influenzae PittEE; ref YP_001289941.1     | 0.20                         | 0.44                 | 0.05                         | 0.11                 | 0.20                         | 0.45                  |
| SALWKB2_0452        | Urease accessory protein J                           | Pseudomonas sp. GM50; ref WP_008009765.1              | 0.10                         | 0.41                 | 0.05                         | 0.21                 | 0.09                         | 0.38                  |
| SALWKB2_0453        | Urease accessory protein G                           | Haemophilus influenzae; ref WP_005692066.1            | 0.05                         | 0.51                 | 0.02                         | 0.23                 | 0.03                         | 0.27                  |
| SALWKB2_0454        | Urease accessory protein D                           | Haemophilus paraphrohaemolyticus; ref WP_005708164.1  | 0.05                         | 0.29                 | 0.08                         | 0.41                 | 0.06                         | 0.30                  |
| SALWKB2_0455        | Conserved hypothetical protein; COG1673              | Planctomyces limnophilus DSM 3776; ref YP_003631252.1 | 0.34                         | 0.33                 | 0.44                         | 0.43                 | 0.24                         | 0.24                  |
| SALWKB2_1196        | GMP synthase                                         | Neisseria weaveri; ref WP_004284982.1                 | 0.19                         | 0.41                 | 0.08                         | 0.17                 | 0.19                         | 0.41                  |
| SALWKB2_1201        | DNA repair rotein radC                               | Flavobacteriaceae bacterium HQM9; ref WP_010522576.1  | 0.19                         | 0.38                 | 0.12                         | 0.25                 | 0.18                         | 0.36                  |
| SALWKB2_1202        | LysR-type transcriptional regulator                  | Providencia burhodogranariae; ref WP_008910958.1      | 0.11                         | 0.31                 | 0.11                         | 0.32                 | 0.13                         | 0.36                  |
| SALWKB2_1204        | Efflux permease of the major facilitator superfamily | Providencia burhodogranariae; ref WP_008910960.1      | 0.05                         | 0.21                 | 0.10                         | 0.43                 | 0.08                         | 0.36                  |
| SALWKB2_1206        | General stress response protein CsbD                 | Lactobacillus fermentum; ref WP_023465858.1           | 0.31                         | 0.45                 | 0.18                         | 0.25                 | 0.21                         | 0.30                  |
| SALWKB2_1294        | Paraquat-inducible protein B                         | Neisseria shayeganii; ref WP_009118480.1              | 0.32                         | 0.36                 | 0.13                         | 0.14                 | 0.43                         | 0.49                  |

<sup>a</sup>absolute (abs) and relative (rel) *dS* values are shown for the three comparisons.
