# Supplementary material for: Hidden Diversity in Honey Bee Gut Symbionts Detected by Single-Cell Genomics
Source: PubMed Central journal article supplement (PMC4161309; doi:10.1371/journal.pgen.1004596), 2014-09-11
Supplement: pgen.1004596.s011.pdf [file pgen.1004596.s011.pdf]

**Table S3.** Ratios (r/m) of recombination (r) and mutation (m) for different strains of *G. apicola* and *S. alvi* based on ClonalFrame analyses.

| Strain                   | All substitutions considered <sup>a</sup> |       | Only substitutions with probabilities $\geq 0.95$ considered <sup>b</sup> |           |        |       |           |        |
|--------------------------|-------------------------------------------|-------|---------------------------------------------------------------------------|-----------|--------|-------|-----------|--------|
|                          | Run 1                                     | Run 2 | Run 1                                                                     |           |        | Run 1 |           |        |
|                          | r / m                                     | r / m | r / m                                                                     | # recomb. | # mut. | r / m | # recomb. | # mut. |
| <b><i>G. apicola</i></b> |                                           |       |                                                                           |           |        |       |           |        |
| P17                      | 5.1                                       | 5.1   | 15.7                                                                      | 5427      | 345    | 15.8  | 5551      | 351    |
| I20                      | 7.0                                       | 7.0   | 23.5                                                                      | 7769      | 330    | 23.8  | 7782      | 327    |
| B02                      | 0.5                                       | 0.5   | 0.8                                                                       | 776       | 931    | 0.8   | 788       | 933    |
| wkB1                     | 0.4                                       | 0.4   | 0.5                                                                       | 478       | 972    | 0.5   | 471       | 947    |
| <b><i>S. alvi</i></b>    |                                           |       |                                                                           |           |        |       |           |        |
| J21                      | 0.2                                       | 0.2   | 0.2                                                                       | 168       | 1083   | 0.2   | 198       | 1232   |
| O02 <sup>c</sup>         | 6.6                                       | 6.5   | n.d.                                                                      | 0         | 0      | n.d.  | 0         | 0      |
| O11                      | 1.1                                       | 1.1   | 0.4                                                                       | 301       | 820    | 0.3   | 288       | 823    |
| P14                      | 0.3                                       | 0.3   | 0.2                                                                       | 214       | 1407   | 0.2   | 249       | 1343   |
| wkB2                     | 0.2                                       | 0.2   | 0.2                                                                       | 270       | 1304   | 0.1   | 138       | 1177   |

<sup>a</sup> ratio r/m was calculated based on the sum of the probabilities of all substitutions to have occurred by recombination divided by the sum of the probabilities of all substitutions to have occurred by mutation.

<sup>b</sup> ratio r/m was calculated based on the sum of all positions for which the probability of substitution via mutation was  $\geq 0.95$  divided by the sum of all positions for which the probability of substitution via recombination was  $\geq 0.95$ .

<sup>c</sup>O02 was too divergent to reliably estimate r/m values with ClonalFrame. Substitution saturation resulted in high r/m values, when all sites were considered. No r/m ratios (n.d., not determined) could be calculated when considering only substitutions with probabilities  $\geq 0.95$ , because substitution probabilities were consistently  $< 0.95$ .
